# Supplementary material for: Prediction of the Secretome and the Surfaceome: A Strategy to Decipher the Crosstalk between Adipose Tissue and Muscle during Fetal Growth
Source: Int J Mol Sci. 2020 Jun 19;21(12):4375. doi: 10.3390/ijms21124375 (PMC7353064; doi:10.3390/ijms21124375)
Supplement: Supplementary file 1 [file ijms-21-04375-s001.xlsx]

## Sheet: Proteome_AT_
Query	Protein Accession Number	Protein ID	Gene Name			Gene Name specific to adipose tissue
1	E5KMI6	E5KMI6_HUMAN	LONP1			RCN3
2	O60884	DNJA2_HUMAN	DNAJA2			PSMA2
3	Q9ULV4	COR1C_HUMAN	CORO1C			PGM2
4	P47710	CASA1_HUMAN	CSN1S1			PRCP
5	Q9NSB2	KRT84_HUMAN	KRT84			GPHN
6	Q9HAV7	GRPE1_HUMAN	GRPEL1			TAGLN
7	P0C0L4	CO4A_HUMAN	C4A			DDX19A
8	Q16555	DPYL2_HUMAN	DPYSL2			CNBP
9	P43652	AFAM_HUMAN	AFM			ACTN3
10	Q9Y265	RUVB1_HUMAN	RUVBL1			TKT
11	P02647	APOA1_HUMAN	APOA1			BID
12	Q15493	RGN_HUMAN	RGN			GGH
13	Q15006	EMC2_HUMAN	EMC2			AIFM1
14	Q92552	RT27_HUMAN	MRPS27			HRMT1L2
15	P28838	AMPL_HUMAN	LAP3			HEBP1
16	P61224	RAP1B_HUMAN	RAP1B			ADD3
17	Q6Y288	B3GLT_HUMAN	B3GALTL			BPGM
18	O75821	EIF3G_HUMAN	EIF3G			HPD
19	P09382	LEG1_HUMAN	LGALS1			HMGCS2
20	P48556	PSMD8_HUMAN	PSMD8			TLN1
21	P11142	HSP7C_HUMAN	HSPA8			PRDX3
22	P68133	ACTS_HUMAN	ACTA1			MFAP4
23	Q9BU02	THTPA_HUMAN	THTPA			SERPINB5
24	P04350	TBB4A_HUMAN	TUBB4A			CLUH
25	P47755	CAZA2_HUMAN	CAPZA2			FAM151B
26	Q15084	PDIA6_HUMAN	PDIA6			COTL1
27	Q15233	NONO_HUMAN	NONO			SOD2
28	P30566	PUR8_HUMAN	ADSL			ECHDC1
29	Q8NFH4	NUP37_HUMAN	NUP37			PKP1
30	Q5HYK3	COQ5_HUMAN	COQ5			GNAI3
31	P15090	FABP4_HUMAN	FABP4			SERPINH1
32	Q14914	PTGR1_HUMAN	PTGR1			LMNB1
33	P57105	SYJ2B_HUMAN	SYNJ2BP			CRABP2
34	P50148	GNAQ_HUMAN	GNAQ			MSN
35	P22061	PIMT_HUMAN	PCMT1			RPS5
36	P17987	TCPA_HUMAN	TCP1			PIR
37	P40227	TCPZ_HUMAN	CCT6A			PPCS
38	O94788	AL1A2_HUMAN	ALDH1A2			LONP1
39	O43639	NCK2_HUMAN	NCK2			PCOLCE
40	P15311	EZRI_HUMAN	EZR			ERP29
41	P46952	3HAO_HUMAN	HAAO			GLRX3
42	Q86WR0	CCD25_HUMAN	CCDC25			EMC2
43	Q00796	DHSO_HUMAN	SORD			UBA1
44	P61201	CSN2_HUMAN	COPS2			MED29
45	Q0VDG4	SCRN3_HUMAN	SCRN3			CCDC50
46	P06899	H2B1J_HUMAN	HIST1H2BJ			DDOST
47	P31939	PUR9_HUMAN	ATIC			GNAI2
48	P07900	HS90A_HUMAN	HSP90AA1			FAHD1
49	O14562	UBFD1_HUMAN	UBFD1			DARS
50	P48735	IDHP_HUMAN	IDH2			HACL1
51	P55809	SCOT1_HUMAN	OXCT1			SFPQ
52	P25325	THTM_HUMAN	MPST			ILF2
53	P34949	MPI_HUMAN	MPI			CSTF2
54	Q9NQX3	GEPH_HUMAN	GPHN			GMPPB
55	P30043	BLVRB_HUMAN	BLVRB			STAM
56	P21695	GPDA_HUMAN	GPD1			WDR89
57	P30042	ES1_HUMAN	C21orf33			ACTL6A
58	Q9Y5X1	SNX9_HUMAN	SNX9			A2M
59	Q92820	GGH_HUMAN	GGH			GRPEL1
60	P54868	HMCS2_HUMAN	HMGCS2			RPS20
61	P20908	CO5A1_HUMAN	COL5A1			MAPK1
62	P29692	EF1D_HUMAN	EEF1D			PDLIM1
63	P30038	AL4A1_HUMAN	ALDH4A1			HNRNPA2B1
64	P08779	K1C16_HUMAN	KRT16			PSMB7
65	P41219	PERI_HUMAN	PRPH			KPNA2
66	Q71U36	TBA1A_HUMAN	TUBA1A			2005-09-01
67	O95336	6PGL_HUMAN	PGLS			UAP1L1
68	P02671	FIBA_HUMAN	FGA			ALDOC
69	P61088	UBE2N_HUMAN	UBE2N			RBM17
70	Q9Y3I0	RTCB_HUMAN	RTCB			CFI
71	P20042	IF2B_HUMAN	EIF2S2			RHOC
72	P61204	ARF3_HUMAN	ARF3			HMOX2
73	Q9HC38	GLOD4_HUMAN	GLOD4			FABP1
74	P12111	CO6A3_HUMAN	COL6A3			ALDH3A2
75	Q9UJZ1	STML2_HUMAN	STOML2			CAPNS1
76	Q16658	FSCN1_HUMAN	FSCN1			TAGLN2
77	P32754	HPPD_HUMAN	HPD			EFHD2
78	Q15126	PMVK_HUMAN	PMVK			BLVRA
79	P20290	BTF3_HUMAN	BTF3			VPS4B
80	Q13509	TBB3_HUMAN	TUBB3			CYGB
81	Q9NQG5	RPR1B_HUMAN	RPRD1B			MB
82	Q8NBJ5	GT251_HUMAN	COLGALT1			UBE2C
83	P49368	TCPG_HUMAN	CCT3			APPL2
84	Q8N6M0	OTU6B_HUMAN	OTUD6B			PSMC2
85	O60568	PLOD3_HUMAN	PLOD3			OSTF1
86	P61106	RAB14_HUMAN	RAB14			EEF1D
87	P62633	CNBP_HUMAN	CNBP			MAPKAPK3
88	O75351	VPS4B_HUMAN	VPS4B			BHMT
89	Q16777	H2A2C_HUMAN	HIST2H2AC			EIF4A1
90	P07355	ANXA2_HUMAN	ANXA2			SNX9
91	Q13363	CTBP1_HUMAN	CTBP1			PCMT1
92	P53004	BIEA_HUMAN	BLVRA			NECAP1
93	Q00169	PIPNA_HUMAN	PITPNA			DNPEP
94	P47985	UCRI_HUMAN	UQCRFS1			PELO
95	Q6P1N9	TATD1_HUMAN	TATDN1			C3
96	O00299	CLIC1_HUMAN	CLIC1			ORM1
97	P29992	GNA11_HUMAN	GNA11			PRPF19
98	P05546	HEP2_HUMAN	SERPIND1			PSAT1
99	Q4G0W3	Q4G0W3_HUMAN	COL14A1			PTGR1
100	Q96EM0	T3HPD_HUMAN	L3HYPDH			NDUFS8
101	Q99714	HCD2_HUMAN	HSD17B10			ADH5
102	P60842	IF4A1_HUMAN	EIF4A1			RBM4
103	Q9NR45	SIAS_HUMAN	NANS			FGG
104	Q9UQ80	PA2G4_HUMAN	PA2G4			SERPINB6
105	P51580	TPMT_HUMAN	TPMT			ALDH4A1
106	P30101	PDIA3_HUMAN	PDIA3			CFL1
107	Q07092	COGA1_HUMAN	COL16A1			TUBB6
108	Q0VDF9	HSP7E_HUMAN	HSPA14			SERPING1
109	Q7Z3Y7	K1C28_HUMAN	KRT28			GNAQ
110	Q9Y680	FKBP7_HUMAN	FKBP7			AKR1D1
111	A0A024R609	A0A024R609_HUMAN	PKM2			QPRT
112	P13716	HEM2_HUMAN	ALAD			SSB
113	O75368	SH3L1_HUMAN	SH3BGRL			CSDE1
114	P60709	ACTB_HUMAN	ACTB			FKBP3
115	P14866	HNRPL_HUMAN	HNRNPL			DPH2
116	O15372	EIF3H_HUMAN	EIF3H			ATP5B
117	P01009	A1AT_HUMAN	SERPINA1			ACTR1B
118	O75153	CLU_HUMAN	CLUH			GPD1
119	O75489	NDUS3_HUMAN	NDUFS3			AP1B1
120	P50995	ANX11_HUMAN	ANXA11			NPM1
121	P09493	TPM1_HUMAN	TPM1			LAMTOR1
122	P49411	EFTU_HUMAN	TUFM			CORO1A
123	Q9UBS4	DJB11_HUMAN	DNAJB11			FUS
124	O75880	SCO1_HUMAN	SCO1			NUDC
125	P08670	VIME_HUMAN	VIM			HBE1
126	P19387	RPB3_HUMAN	POLR2C			RAB14
127	P49721	PSB2_HUMAN	PSMB2			COL14A1
128	P15121	ALDR_HUMAN	AKR1B1			EIF3M
129	P01111	RASN_HUMAN	NRAS			SAMM50
130	P02675	FIBB_HUMAN	FGB			RPS3
131	P08559	ODPA_HUMAN	PDHA1			NIF3L1
132	P35241	RADI_HUMAN	RDX			GNPDA2
133	Q93088	BHMT1_HUMAN	BHMT			ALDH1A1
134	P11172	UMPS_HUMAN	UMPS			FKBP14
135	O75083	WDR1_HUMAN	WDR1			MTAP
136	P05155	IC1_HUMAN	SERPING1			GNA11
137	Q92688	AN32B_HUMAN	ANP32B			TSG101
138	P62993	GRB2_HUMAN	GRB2			HPRT1
139	Q14315	FLNC_HUMAN	FLNC			TUBA1C
140	P39019	RS19_HUMAN	RPS19			DYNC1LI2
141	Q6P587	FAHD1_HUMAN	FAHD1			RBBP7
142	P61086	UBE2K_HUMAN	UBE2K			TUBG1
143	Q86XE5	HOGA1_HUMAN	HOGA1			ADK
144	P52565	GDIR1_HUMAN	ARHGDIA			BTF3
145	Q8N8N7	PTGR2_HUMAN	PTGR2			SARS
146	P19338	NUCL_HUMAN	NCL			LRRC40
147	Q92785	REQU_HUMAN	DPF2			ACADL
148	P08697	A2AP_HUMAN	SERPINF2			HSP90AB1
149	P07996	TSP1_HUMAN	THBS1			PAAF1
150	Q9NRN5	OLFL3_HUMAN	OLFML3			LSM12
151	Q6IBS0	TWF2_HUMAN	TWF2			MRPS27
152	Q96IY4	CBPB2_HUMAN	CPB2			TRIOBP
153	P09429	HMGB1_HUMAN	HMGB1			NCL
154	O43488	ARK72_HUMAN	AKR7A2			ACTR1A
155	O60814	H2B1K_HUMAN	HIST1H2BK			PSMD10
156	P49419	AL7A1_HUMAN	ALDH7A1			C4A
157	P02749	APOH_HUMAN	APOH			SORD
158	P61158	ARP3_HUMAN	ACTR3			SPC25
159	P26440	IVD_HUMAN	IVD			SCRN3
160	Q14019	COTL1_HUMAN	COTL1			KRT18
161	Q15848	ADIPO_HUMAN	ADIPOQ			DCTN3
162	Q00688	FKBP3_HUMAN	FKBP3			PCCB
163	P22352	GPX3_HUMAN	GPX3			DPF2
164	P25398	RS12_HUMAN	RPS12			GSTP1
165	Q9UL15	BAG5_HUMAN	BAG5			COMMD5
166	Q06033	ITIH3_HUMAN	ITIH3			HDHD2
167	P35270	SPRE_HUMAN	SPR			ENAH
168	P34897	GLYM_HUMAN	SHMT2			TRIM28
169	P06576	ATPB_HUMAN	ATP5B			ALDH1A2
170	P00387	NB5R3_HUMAN	CYB5R3			HADHB
171	Q9BT78	CSN4_HUMAN	COPS4			FKBP4
172	Q13155	AIMP2_HUMAN	AIMP2			ADSL
173	Q9NTX5	ECHD1_HUMAN	ECHDC1			KHK
174	P60953	CDC42_HUMAN	CDC42			COL16A1
175	P08134	RHOC_HUMAN	RHOC			SF3A3
176	P35080	PROF2_HUMAN	PFN2			PBLD
177	P05166	PCCB_HUMAN	PCCB			AHNAK
178	Q9NUU7	DD19A_HUMAN	DDX19A			PDHX
179	Q99961	SH3G1_HUMAN	SH3GL1			HBB
180	P40925	MDHC_HUMAN	MDH1			CYB5R3
181	Q96GK7	FAH2A_HUMAN	FAHD2A			ARMC6
182	Q99816	TS101_HUMAN	TSG101			PSMD5
183	P13726	TF_HUMAN	F3			C21orf33
184	Q9Y512	SAM50_HUMAN	SAMM50			CDC37
185	Q13409	DC1I2_HUMAN	DYNC1I2			EIF4A3
186	P18754	RCC1_HUMAN	RCC1			CPB2
187	P36955	PEDF_HUMAN	SERPINF1			PRPH
188	Q8N335	GPD1L_HUMAN	GPD1L			TPMT
189	O00330	ODPX_HUMAN	PDHX			FTL
190	Q96AY3	FKB10_HUMAN	FKBP10			YWHAZ
191	Q8NEU8	DP13B_HUMAN	APPL2			H2AFV
192	P40121	CAPG_HUMAN	CAPG			ACSF2
193	Q7Z794	K2C1B_HUMAN	KRT77			MAT1A
194	P49662	CASP4_HUMAN	CASP4			TMPO
195	P20774	MIME_HUMAN	OGN			GOT2
196	P04792	HSPB1_HUMAN	HSPB1			HDGFRP3
197	O43396	TXNL1_HUMAN	TXNL1			OXCT1
198	Q15124	PGM5_HUMAN	PGM5			SGSH
199	Q8IW45	NNRD_HUMAN	CARKD			GALT
200	Q96D15	RCN3_HUMAN	RCN3			PLG
201	Q8NC96	NECP1_HUMAN	NECAP1			TUBG2
202	P10768	ESTD_HUMAN	ESD			CCT4
203	Q96I99	SUCB2_HUMAN	SUCLG2			ISOC1
204	P07339	CATD_HUMAN	CTSD			THTPA
205	P13674	P4HA1_HUMAN	P4HA1			MAPK14
206	Q96CM8	ACSF2_HUMAN	ACSF2			2008-09-01
207	P29401	TKT_HUMAN	TKT			GC
208	P60900	PSA6_HUMAN	PSMA6			ANXA6
209	P26368	U2AF2_HUMAN	U2AF2			ALDH6A1
210	O75935	DCTN3_HUMAN	DCTN3			RDX
211	P60174	TPIS_HUMAN	TPI1			DNAJC9
212	Q01518	CAP1_HUMAN	CAP1			CTBP2
213	Q6IRT1	Q6IRT1_HUMAN	ADH5			UMPS
214	P02771	FETA_HUMAN	AFP			FETUB
215	Q01469	FABP5_HUMAN	FABP5			GANAB
216	P31146	COR1A_HUMAN	CORO1A			PCBP3
217	Q14974	IMB1_HUMAN	KPNB1			HNRNPA0
218	Q15365	PCBP1_HUMAN	PCBP1			YARS
219	Q96IU4	ABHEB_HUMAN	ABHD14B			UQCRFS1
220	P20339	RAB5A_HUMAN	RAB5A			PDIA6
221	P49918	CDN1C_HUMAN	CDKN1C			TGFBR3
222	Q9BXP5	SRRT_HUMAN	SRRT			HAAO
223	Q16543	CDC37_HUMAN	CDC37			CNDP2
224	P13645	K1C10_HUMAN	KRT10			HOGA1
225	O76003	GLRX3_HUMAN	GLRX3			SULT1A1
226	Q96M27	PRRC1_HUMAN	PRRC1			AKR7A2
227	P67870	CSK2B_HUMAN	CSNK2B			FKBP10
228	Q02790	FKBP4_HUMAN	FKBP4			NIT2
229	P01591	IGJ_HUMAN	IGJ			CAT
230	P62136	PP1A_HUMAN	PPP1CA			MAP2K2
231	Q9BQE3	TBA1C_HUMAN	TUBA1C			RPN1
232	O94905	ERLN2_HUMAN	ERLIN2			PMVK
233	P12829	MYL4_HUMAN	MYL4			FHL2
234	P35232	PHB_HUMAN	PHB			VIM
235	O95678	K2C75_HUMAN	KRT75			MPI
236	Q13151	ROA0_HUMAN	HNRNPA0			PSMD13
237	P36952	SPB5_HUMAN	SERPINB5			PSMD8
238	P68871	HBB_HUMAN	HBB			SPR
239	P06396	GELS_HUMAN	GSN			GSTO1
240	Q92599	SEPT8_HUMAN	SEPT8			TWF2
241	P05452	TETN_HUMAN	CLEC3B			FABP4
242	P12429	ANXA3_HUMAN	ANXA3			KRT8
243	P02679	FIBG_HUMAN	FGG			DNAJC17
244	Q13162	PRDX4_HUMAN	PRDX4			ATP5H
245	Q9Y5X3	SNX5_HUMAN	SNX5			CYC1
246	P04264	K2C1_HUMAN	KRT1			LCP1
247	P49748	ACADV_HUMAN	ACADVL			RAB5A
248	Q5XKE5	K2C79_HUMAN	KRT79			EIF4A2
249	P22314	UBA1_HUMAN	UBA1			CSTB
250	Q13907	IDI1_HUMAN	IDI1			ACADVL
251	P08729	K2C7_HUMAN	KRT7			COL6A3
252	Q05048	CSTF1_HUMAN	CSTF1			APOA1BP
253	O94760	DDAH1_HUMAN	DDAH1			CD2AP
254	P62826	RAN_HUMAN	RAN			LAP3
255	P28330	ACADL_HUMAN	ACADL			OTC
256	P19012	K1C15_HUMAN	KRT15			RUVBL1
257	Q9Y696	CLIC4_HUMAN	CLIC4			FUOM
258	Q9UJ83	HACL1_HUMAN	HACL1			RPL11
259	P00352	AL1A1_HUMAN	ALDH1A1			HADHA
260	Q96ER9	CCD51_HUMAN	CCDC51			ARF3
261	O43924	PDE6D_HUMAN	PDE6D			PGM5
262	P20700	LMNB1_HUMAN	LMNB1			CSNK2B
263	Q99536	VAT1_HUMAN	VAT1			RAB1A
264	P00491	PNPH_HUMAN	PNP			POLR2C
265	Q7Z3Z0	K1C25_HUMAN	KRT25			CAP1
266	Q16222	UAP1_HUMAN	UAP1			ARG1
267	P04899	GNAI2_HUMAN	GNAI2			GPX3
268	P06732	KCRM_HUMAN	CKM			EIF2S2
269	Q71UI9	H2AV_HUMAN	H2AFV			CBS
270	Q9ULA0	DNPEP_HUMAN	DNPEP			PRPS1
271	O15305	PMM2_HUMAN	PMM2			MRPS22
272	Q9Y617	SERC_HUMAN	PSAT1			DPYS
273	P39656	OST48_HUMAN	DDOST			CDC42
274	P42025	ACTY_HUMAN	ACTR1B			HEXB
275	P21266	GSTM3_HUMAN	GSTM3			TPM1
276	P04181	OAT_HUMAN	OAT			TOMM40
277	P78371	TCPB_HUMAN	CCT2			PTER
278	P31948	STIP1_HUMAN	STIP1			GALM
279	P17661	DESM_HUMAN	DES			P4HB
280	Q9BQ04	RBM4B_HUMAN	RBM4B			2011-09-01
281	Q9BUF5	TBB6_HUMAN	TUBB6			FLNB
282	Q99627	CSN8_HUMAN	COPS8			PGLS
283	Q9GZQ3	COMD5_HUMAN	COMMD5			ADD1
284	Q9NRX4	PHP14_HUMAN	PHPT1			COLGALT1
285	P04406	G3P_HUMAN	GAPDH			ANP32A
286	Q15274	NADC_HUMAN	QPRT			HMGCS1
287	P28072	PSB6_HUMAN	PSMB6			ARRB1
288	P15924	DESP_HUMAN	DSP			PSMB1
289	Q96I25	SPF45_HUMAN	RBM17			RNF114
290	P48637	GSHB_HUMAN	GSS			TXNL1
291	P02766	TTHY_HUMAN	TTR			ITIH3
292	Q03167	TGBR3_HUMAN	TGFBR3			DEK
293	O43684	BUB3_HUMAN	BUB3			PEF1
294	Q9NVM6	DJC17_HUMAN	DNAJC17			AMDHD2
295	Q12874	SF3A3_HUMAN	SF3A3			PSPC1
296	P52888	THOP1_HUMAN	THOP1			SERPINC1
297	P62873	GBB1_HUMAN	GNB1			DCN
298	Q9NX70	MED29_HUMAN	MED29			SRRT
299	P14550	AK1A1_HUMAN	AKR1A1			SUCLG2
300	P06733	ENOA_HUMAN	ENO1			ESD
301	P47895	AL1A3_HUMAN	ALDH1A3			PPIA
302	P19404	NDUV2_HUMAN	NDUFV2			ABHD14A
303	O43175	SERA_HUMAN	PHGDH			ACTN1
304	P33240	CSTF2_HUMAN	CSTF2			PHB
305	P37802	TAGL2_HUMAN	TAGLN2			PYGM
306	Q8WXF1	PSPC1_HUMAN	PSPC1			KPNB1
307	Q3LXA3	DHAK_HUMAN	DAK			KRT12
308	P04080	CYTB_HUMAN	CSTB			RCN1
309	P05156	CFAI_HUMAN	CFI			UBE2K
310	P37837	TALDO_HUMAN	TALDO1			DCTN2
311	P32119	PRDX2_HUMAN	PRDX2			AFM
312	P52292	IMA1_HUMAN	KPNA2			KRT84
313	Q12905	ILF2_HUMAN	ILF2			GPX1
314	Q9BWD1	THIC_HUMAN	ACAT2			TUBB3
315	Q3KQV9	UAP1L_HUMAN	UAP1L1			THOP1
316	P35237	SPB6_HUMAN	SERPINB6			ANKMY2
317	Q3MHD2	LSM12_HUMAN	LSM12			CASP4
318	P48739	PIPNB_HUMAN	PITPNB			APEX1
319	Q6UXP7	F151B_HUMAN	FAM151B			PMM2
320	P06748	NPM_HUMAN	NPM1			TUFM
321	P25786	PSA1_HUMAN	PSMA1			GLB1
322	O14773	TPP1_HUMAN	TPP1			PDIA4
323	Q9UGM5	FETUB_HUMAN	FETUB			AK2
324	P35611	ADDA_HUMAN	ADD1			SERPINA3
325	Q96FK6	WDR89_HUMAN	WDR89			NDUFS3
326	Q15102	PA1B3_HUMAN	PAFAH1B3			SERPINF2
327	O95299	NDUAA_HUMAN	NDUFA10			ME1
328	O00170	AIP_HUMAN	AIP			PLOD3
329	P83916	CBX1_HUMAN	CBX1			NUP50
330	P04632	CPNS1_HUMAN	CAPNS1			DYNC1I2
331	Q2M2I5	K1C24_HUMAN	KRT24			DDX3X
332	P02774	VTDB_HUMAN	GC			GATM
333	P40939	ECHA_HUMAN	HADHA			HEXA
334	O75369	FLNB_HUMAN	FLNB			HNRNPL
335	Q92783	STAM1_HUMAN	STAM			AIP
336	Q14847	LASP1_HUMAN	LASP1			RCC1
337	Q14697	GANAB_HUMAN	GANAB			AIMP2
338	Q9BRP4	PAAF1_HUMAN	PAAF1			FLNA
339	Q9UNH7	SNX6_HUMAN	SNX6			SH3GL1
340	Q15019	SEPT2_HUMAN	SEPT2			EIF3H
341	P04083	ANXA1_HUMAN	ANXA1			COL1A2
342	P20073	ANXA7_HUMAN	ANXA7			GPD1L
343	Q14141	SEPT6_HUMAN	SEPT6			SERPINA5
344	P63104	1433Z_HUMAN	YWHAZ			SERPIND1
345	P00338	LDHA_HUMAN	LDHA			NANS
346	P07738	PMGE_HUMAN	BPGM			SUOX
347	P16333	NCK1_HUMAN	NCK1			NDUFV2
348	P68104	EF1A1_HUMAN	EEF1A1			HRSP12
349	O75347	TBCA_HUMAN	TBCA			SELENBP1
350	P62820	RAB1A_HUMAN	RAB1A			CARKD
351	O00762	UBE2C_HUMAN	UBE2C			TUBB4A
352	P09211	GSTP1_HUMAN	GSTP1			CRTAP
353	P27695	APEX1_HUMAN	APEX1			SCO1
354	Q969T9	WBP2_HUMAN	WBP2			STMN1
355	Q13126	MTAP_HUMAN	MTAP			BLVRB
356	P12109	CO6A1_HUMAN	COL6A1			RAN
357	P51648	AL3A2_HUMAN	ALDH3A2			MCCC2
358	Q14103	HNRPD_HUMAN	HNRNPD			IGJ
359	Q9BZK7	TBL1R_HUMAN	TBL1XR1			EEF1G
360	Q9UKX2	MYH2_HUMAN	MYH2			B3GALTL
361	Q8N8S7	ENAH_HUMAN	ENAH			HMBS
362	P28161	GSTM2_HUMAN	GSTM2			PFDN2
363	P36871	PGM1_HUMAN	PGM1			LSM7
364	O95831	AIFM1_HUMAN	AIFM1			HSP90AA1
365	P49407	ARRB1_HUMAN	ARRB1			CKAP4
366	P11217	PYGM_HUMAN	PYGM			DNAJB11
367	P38919	IF4A3_HUMAN	EIF4A3			TRAPPC13
368	P55083	MFAP4_HUMAN	MFAP4			OAT
369	P05089	ARGI1_HUMAN	ARG1			CCDC51
370	P55072	TERA_HUMAN	VCP			BTF3L4
371	O75534	CSDE1_HUMAN	CSDE1			ARHGDIB
372	P23246	SFPQ_HUMAN	SFPQ			ADIPOQ
373	Q9Y230	RUVB2_HUMAN	RUVBL2			MPST
374	P13796	PLSL_HUMAN	LCP1
375	P23528	COF1_HUMAN	CFL1
376	Q08752	PPID_HUMAN	PPID
377	P08727	K1C19_HUMAN	KRT19
378	P35520	CBS_HUMAN	CBS
379	P07951	TPM2_HUMAN	TPM2
380	P30041	PRDX6_HUMAN	PRDX6
381	P09972	ALDOC_HUMAN	ALDOC
382	Q6IAA8	LTOR1_HUMAN	LAMTOR1
383	P05783	K1C18_HUMAN	KRT18
384	Q00266	METK1_HUMAN	MAT1A
385	P62191	PRS4_HUMAN	PSMC1
386	P36957	ODO2_HUMAN	DLST
387	F8VPP1	F8VPP1_HUMAN	AK2
388	P12081	SYHC_HUMAN	HARS
389	Q14192	FHL2_HUMAN	FHL2
390	Q13347	EIF3I_HUMAN	EIF3I
391	P05455	LA_HUMAN	SSB
392	P46108	CRK_HUMAN	CRK
393	P31943	HNRH1_HUMAN	HNRNPH1
394	P08758	ANXA5_HUMAN	ANXA5
395	Q9UEY8	ADDG_HUMAN	ADD3
396	P07203	GPX1_HUMAN	GPX1
397	P08397	HEM3_HUMAN	HMBS
398	P26038	MOES_HUMAN	MSN
399	P54577	SYYC_HUMAN	YARS
400	Q15366	PCBP2_HUMAN	PCBP2
401	Q5T1C6	THEM4_HUMAN	THEM4
402	P48643	TCPE_HUMAN	CCT5
403	A0A024R2P0	A0A024R2P0_HUMAN	RPSA
404	Q9Y5Y2	NUBP2_HUMAN	NUBP2
405	P51687	SUOX_HUMAN	SUOX
406	Q96CN7	ISOC1_HUMAN	ISOC1
407	A5PLN9	TPC13_HUMAN	TRAPPC13
408	P50225	ST1A1_HUMAN	SULT1A1
409	P60891	PRPS1_HUMAN	PRPS1
410	Q9BR76	COR1B_HUMAN	CORO1B
411	P12035	K2C3_HUMAN	KRT3
412	P35659	DEK_HUMAN	DEK
413	P62140	PP1B_HUMAN	PPP1CB
414	P48444	COPD_HUMAN	ARCN1
415	P55263	ADK_HUMAN	ADK
416	Q01995	TAGL_HUMAN	TAGLN
417	P02790	HEMO_HUMAN	HPX
418	Q9Y3E1	HDGR3_HUMAN	HDGFRP3
419	O75718	CRTAP_HUMAN	CRTAP
420	Q13185	CBX3_HUMAN	CBX3
421	Q9NRN7	ADPPT_HUMAN	AASDHPPT
422	P57721	PCBP3_HUMAN	PCBP3
423	Q96G03	PGM2_HUMAN	PGM2
424	P62995	TRA2B_HUMAN	TRA2B
425	P07195	LDHB_HUMAN	LDHB
426	Q9NPH2	INO1_HUMAN	ISYNA1
427	P30740	ILEU_HUMAN	SERPINB1
428	O95861	BPNT1_HUMAN	BPNT1
429	P61978	HNRPK_HUMAN	HNRNPK
430	P02792	FRIL_HUMAN	FTL
431	Q14195	DPYL3_HUMAN	DPYSL3
432	Q9UL46	PSME2_HUMAN	PSME2
433	Q06323	PSME1_HUMAN	PSME1
434	O00764	PDXK_HUMAN	PDXK
435	P01042	KNG1_HUMAN	KNG1
436	Q10567	AP1B1_HUMAN	AP1B1
437	P62879	GBB2_HUMAN	GNB2
438	Q9NRH3	TBG2_HUMAN	TUBG2
439	Q9GZT8	NIF3L_HUMAN	NIF3L1
440	P36507	MP2K2_HUMAN	MAP2K2
441	P02763	A1AG1_HUMAN	ORM1
442	P48668	K2C6C_HUMAN	KRT6C
443	Q13228	SBP1_HUMAN	SELENBP1
444	P05154	IPSP_HUMAN	SERPINA5
445	P09104	ENOG_HUMAN	ENO2
446	P12277	KCRB_HUMAN	CKB
447	P55084	ECHB_HUMAN	HADHB
448	P26641	EF1G_HUMAN	EEF1G
449	P05388	RLA0_HUMAN	RPLP0
450	P02533	K1C14_HUMAN	KRT14
451	P13647	K2C5_HUMAN	KRT5
452	Q9UKX7	NUP50_HUMAN	NUP50
453	Q6ZNW5	GDPP1_HUMAN	GDPGP1
454	P62736	ACTA_HUMAN	ACTA2
455	P00492	HPRT_HUMAN	HPRT1
456	P42166	LAP2A_HUMAN	TMPO
457	Q9Y266	NUDC_HUMAN	NUDC
458	P31930	QCR1_HUMAN	UQCRC1
459	O43237	DC1L2_HUMAN	DYNC1LI2
460	P14868	SYDC_HUMAN	DARS
461	Q9BRX2	PELO_HUMAN	PELO
462	P08123	CO1A2_HUMAN	COL1A2
463	Q9BUJ0	ABHEA_HUMAN	ABHD14A
464	P49903	SPS1_HUMAN	SEPHS1
465	Q13442	HAP28_HUMAN	PDAP1
466	Q6NXE6	ARMC6_HUMAN	ARMC6
467	P01023	A2MG_HUMAN	A2M
468	Q96C86	DCPS_HUMAN	DCPS
469	Q99719	SEPT5_HUMAN	SEPT5
470	P11413	G6PD_HUMAN	G6PD
471	O75832	PSD10_HUMAN	PSMD10
472	P50053	KHK_HUMAN	KHK
473	Q08043	ACTN3_HUMAN	ACTN3
474	P42785	PCP_HUMAN	PRCP
475	Q13011	ECH1_HUMAN	ECH1
476	Q9H0R4	HDHD2_HUMAN	HDHD2
477	P45880	VDAC2_HUMAN	VDAC2
478	P09417	DHPR_HUMAN	QDPR
479	Q96KP4	CNDP2_HUMAN	CNDP2
480	P49189	AL9A1_HUMAN	ALDH9A1
481	P02760	AMBP_HUMAN	AMBP
482	P06865	HEXA_HUMAN	HEXA
483	P60866	RS20_HUMAN	RPS20
484	Q13561	DCTN2_HUMAN	DCTN2
485	Q16851	UGPA_HUMAN	UGP2
486	P04179	SODM_HUMAN	SOD2
487	Q3LIE5	ADPRM_HUMAN	ADPRM
488	P51570	GALK1_HUMAN	GALK1
489	P12882	MYH1_HUMAN	MYH1
490	P62258	1433E_HUMAN	YWHAE
491	P28482	MK01_HUMAN	MAPK1
492	P50991	TCPD_HUMAN	CCT4
493	Q9UN37	VPS4A_HUMAN	VPS4A
494	Q9H9A6	LRC40_HUMAN	LRRC40
495	P30086	PEBP1_HUMAN	PEBP1
496	O94903	PROSC_HUMAN	PROSC
497	P00441	SODC_HUMAN	SOD1
498	P48507	GSH0_HUMAN	GCLM
499	P23258	TBG1_HUMAN	TUBG1
500	O00625	PIR_HUMAN	PIR
501	Q53H96	P5CR3_HUMAN	PYCRL
502	Q16644	MAPK3_HUMAN	MAPKAPK3
503	Q8IUH3	RBM45_HUMAN	RBM45
504	P01011	AACT_HUMAN	SERPINA3
505	P31942	HNRH3_HUMAN	HNRNPH3
506	P07858	CATB_HUMAN	CTSB
507	P13693	TCTP_HUMAN	TPT1
508	P30039	PBLD_HUMAN	PBLD
509	Q9Y490	TLN1_HUMAN	TLN1
510	Q9HCC0	MCCB_HUMAN	MCCC2
511	Q5U8W9	Q5U8W9_HUMAN	HRMT1L2
512	Q9BT09	CNPY3_HUMAN	CNPY3
513	Q96DE0	NUD16_HUMAN	NUDT16
514	O96019	ACL6A_HUMAN	ACTL6A
515	P09622	DLDH_HUMAN	DLD
516	P25787	PSA2_HUMAN	PSMA2
517	P30085	KCY_HUMAN	CMPK1
518	P35637	FUS_HUMAN	FUS
519	P08574	CY1_HUMAN	CYC1
520	Q9Y3B8	ORN_HUMAN	REXO2
521	P04843	RPN1_HUMAN	RPN1
522	P07237	PDIA1_HUMAN	P4HB
523	P19013	K2C4_HUMAN	KRT4
524	Q9UBV8	PEF1_HUMAN	PEF1
525	Q9BTE6	AASD1_HUMAN	AARSD1
526	Q9Y6G9	DC1L1_HUMAN	DYNC1LI1
527	P55010	IF5_HUMAN	EIF5
528	P02538	K2C6A_HUMAN	KRT6A
529	P00505	AATM_HUMAN	GOT2
530	Q14696	MESD_HUMAN	MESDC2
531	Q9UK45	LSM7_HUMAN	LSM7
532	Q8IVM0	CCD50_HUMAN	CCDC50
533	P48163	MAOX_HUMAN	ME1
534	P51688	SPHM_HUMAN	SGSH
535	Q9Y5P6	GMPPB_HUMAN	GMPPB
536	P52758	UK114_HUMAN	HRSP12
537	Q09666	AHNK_HUMAN	AHNAK
538	P56545	CTBP2_HUMAN	CTBP2
539	P30519	HMOX2_HUMAN	HMOX2
540	P00480	OTC_HUMAN	OTC
541	Q13148	TADBP_HUMAN	TARDBP
542	Q16539	MK14_HUMAN	MAPK14
543	P51884	LUM_HUMAN	LUM
544	P61163	ACTZ_HUMAN	ACTR1A
545	P39687	AN32A_HUMAN	ANP32A
546	A6NIH7	U119B_HUMAN	UNC119B
547	P35908	K22E_HUMAN	KRT2
548	Q9UHV9	PFD2_HUMAN	PFDN2
549	Q03252	LMNB2_HUMAN	LMNB2
550	P35998	PRS7_HUMAN	PSMC2
551	Q13838	DX39B_HUMAN	DDX39B
552	Q9BVA1	TBB2B_HUMAN	TUBB2B
553	Q9Y508	RN114_HUMAN	RNF114
554	P02545	LMNA_HUMAN	LMNA
555	P01024	CO3_HUMAN	C3
556	P18669	PGAM1_HUMAN	PGAM1
557	Q9BS40	LXN_HUMAN	LXN
558	P52566	GDIR2_HUMAN	ARHGDIB
559	P30084	ECHM_HUMAN	ECHS1
560	P52907	CAZA1_HUMAN	CAPZA1
561	P30040	ERP29_HUMAN	ERP29
562	P07148	FABPL_HUMAN	FABP1
563	P10599	THIO_HUMAN	TXN
564	Q16401	PSMD5_HUMAN	PSMD5
565	P02765	FETUA_HUMAN	AHSG
566	Q9Y5K6	CD2AP_HUMAN	CD2AP
567	O96008	TOM40_HUMAN	TOMM40
568	P62913	RL11_HUMAN	RPL11
569	Q07065	CKAP4_HUMAN	CKAP4
570	P23381	SYWC_HUMAN	WARS
571	P07585	PGS2_HUMAN	DCN
572	P35609	ACTN2_HUMAN	ACTN2
573	P14923	PLAK_HUMAN	JUP
574	P09936	UCHL1_HUMAN	UCHL1
575	Q99832	TCPH_HUMAN	CCT7
576	Q04760	LGUL_HUMAN	GLO1
577	Q01546	K22O_HUMAN	KRT76
578	Q96K17	BT3L4_HUMAN	BTF3L4
579	O75608	LYPA1_HUMAN	LYPLA1
580	P08754	GNAI3_HUMAN	GNAI3
581	Q9UMS4	PRP19_HUMAN	PRPF19
582	P23526	SAHH_HUMAN	AHCY
583	P02753	RET4_HUMAN	RBP4
584	Q96C23	GALM_HUMAN	GALM
585	Q9Y303	NAGA_HUMAN	AMDHD2
586	Q8WXX5	DNJC9_HUMAN	DNAJC9
587	Q9NWM8	FKB14_HUMAN	FKBP14
588	P13667	PDIA4_HUMAN	PDIA4
589	P68402	PA1B2_HUMAN	PAFAH1B2
590	O95433	AHSA1_HUMAN	AHSA1
591	P30613	KPYR_HUMAN	PKLR
592	O00151	PDLI1_HUMAN	PDLIM1
593	Q99497	PARK7_HUMAN	PARK7
594	Q13263	TIF1B_HUMAN	TRIM28
595	Q04695	K1C17_HUMAN	KRT17
596	P04040	CATA_HUMAN	CAT
597	A0A024RDF6	A0A024RDF6_HUMAN	HNRPDL
598	P02100	HBE_HUMAN	HBE1
599	O14558	HSPB6_HUMAN	HSPB6
600	P29373	RABP2_HUMAN	CRABP2
601	Q9HAB8	PPCS_HUMAN	PPCS
602	O75947	ATP5H_HUMAN	ATP5H
603	P52209	6PGD_HUMAN	PGD
604	P50454	SERPH_HUMAN	SERPINH1
605	P05787	K2C8_HUMAN	KRT8
606	Q15063	POSTN_HUMAN	POSTN
607	Q02750	MP2K1_HUMAN	MAP2K1
608	Q9HBM1	SPC25_HUMAN	SPC25
609	Q96C19	EFHD2_HUMAN	EFHD2
610	E7ETK5	E7ETK5_HUMAN	IMPDH2
611	Q9UNM6	PSD13_HUMAN	PSMD13
612	Q96DG6	CMBL_HUMAN	CMBL
613	P68371	TBB4B_HUMAN	TUBB4B
614	Q15293	RCN1_HUMAN	RCN1
615	Q9P2R7	SUCB1_HUMAN	SUCLA2
616	Q9BQC3	DPH2_HUMAN	DPH2
617	P08133	ANXA6_HUMAN	ANXA6
618	P05976	MYL1_HUMAN	MYL1
619	O00233	PSMD9_HUMAN	PSMD9
620	P16949	STMN1_HUMAN	STMN1
621	P31153	METK2_HUMAN	MAT2A
622	P06132	DCUP_HUMAN	UROD
623	P02144	MYG_HUMAN	MB
624	P05091	ALDH2_HUMAN	ALDH2
625	P45973	CBX5_HUMAN	CBX5
626	Q99436	PSB7_HUMAN	PSMB7
627	O00217	NDUS8_HUMAN	NDUFS8
628	P50395	GDIB_HUMAN	GDI2
629	P00918	CAH2_HUMAN	CA2
630	Q9Y2S2	CRYL1_HUMAN	CRYL1
631	P46782	RS5_HUMAN	RPS5
632	Q14353	GAMT_HUMAN	GAMT
633	P25705	ATPA_HUMAN	ATP5A1
634	P51857	AK1D1_HUMAN	AKR1D1
635	P78417	GSTO1_HUMAN	GSTO1
636	Q9H2D6	TARA_HUMAN	TRIOBP
637	P07902	GALT_HUMAN	GALT
638	Q02252	MMSA_HUMAN	ALDH6A1
639	P50213	IDH3A_HUMAN	IDH3A
640	P02768	ALBU_HUMAN	ALB
641	Q8IV38	ANKY2_HUMAN	ANKMY2
642	P07686	HEXB_HUMAN	HEXB
643	P22626	ROA2_HUMAN	HNRNPA2B1
644	O95865	DDAH2_HUMAN	DDAH2
645	Q9Y371	SHLB1_HUMAN	SH3GLB1
646	Q8NCW5	NNRE_HUMAN	APOA1BP
647	P16278	BGAL_HUMAN	GLB1
648	Q99456	K1C12_HUMAN	KRT12
649	P47756	CAPZB_HUMAN	CAPZB
650	P30626	SORCN_HUMAN	SRI
651	Q92882	OSTF1_HUMAN	OSTF1
652	Q969J3	L12R1_HUMAN	LOH12CR1
653	P69905	HBA_HUMAN	HBA2
654	Q9NVA2	SEP11_HUMAN	SEPT11
655	Q96BW5	PTER_HUMAN	PTER
656	P30048	PRDX3_HUMAN	PRDX3
657	Q567R9	Q567R9_HUMAN	CIP29
658	A2VDF0	FUCM_HUMAN	FUOM
659	P62937	PPIA_HUMAN	PPIA
660	P49720	PSB3_HUMAN	PSMB3
661	P61326	MGN_HUMAN	MAGOH
662	P23396	RS3_HUMAN	RPS3
663	P12814	ACTN1_HUMAN	ACTN1
664	Q15417	CNN3_HUMAN	CNN3
665	Q8TDQ7	GNPI2_HUMAN	GNPDA2
666	P26599	PTBP1_HUMAN	PTBP1
667	P68032	ACTC_HUMAN	ACTC1
668	P29762	RABP1_HUMAN	CRABP1
669	Q9NQR4	NIT2_HUMAN	NIT2
670	Q13835	PKP1_HUMAN	PKP1
671	Q96A32	MLRS_HUMAN	MYLPF
672	Q9NRV9	HEBP1_HUMAN	HEBP1
673	Q9H0E2	TOLIP_HUMAN	TOLLIP
674	P20618	PSB1_HUMAN	PSMB1
675	P21333	FLNA_HUMAN	FLNA
676	Q14117	DPYS_HUMAN	DPYS
677	Q14240	IF4A2_HUMAN	EIF4A2
678	O00571	DDX3X_HUMAN	DDX3X
679	O75874	IDHC_HUMAN	IDH1
680	P28070	PSB4_HUMAN	PSMB4
681	P48681	NEST_HUMAN	NES
682	P04075	ALDOA_HUMAN	ALDOA
683	P68366	TBA4A_HUMAN	TUBA4A
684	P11021	GRP78_HUMAN	HSPA5
685	Q15113	PCOC1_HUMAN	PCOLCE
686	P46109	CRKL_HUMAN	CRKL
687	P82650	RT22_HUMAN	MRPS22
688	P50440	GATM_HUMAN	GATM
689	Q01581	HMCS1_HUMAN	HMGCS1
690	Q07955	SRSF1_HUMAN	SRSF1
691	P08238	HS90B_HUMAN	HSP90AB1
692	P00367	DHE3_HUMAN	GLUD1
693	P63261	ACTG_HUMAN	ACTG1
694	P55957	BID_HUMAN	BID
695	Q16576	RBBP7_HUMAN	RBBP7
696	P00747	PLMN_HUMAN	PLG
697	P01008	ANT3_HUMAN	SERPINC1
698	Q8WWM9	CYGB_HUMAN	CYGB
699	Q9BWF3	RBM4_HUMAN	RBM4
700	Q99729	ROAA_HUMAN	HNRNPAB
701	P36873	PP1G_HUMAN	PPP1CC
702	P49591	SYSC_HUMAN	SARS
703	O43399	TPD54_HUMAN	TPD52L2
704	Q7L2H7	EIF3M_HUMAN	EIF3M

## Sheet: Proteome_Muscle
Query	Protein Accession Number	Protein ID	Gene Name			Gene Name specific to muscle
1	P36955	PEDF_HUMAN	SERPINF1			AK1
2	Q6QEF8	CORO6_HUMAN	CORO6			CASQ1
3	Q14696	MESD_HUMAN	MESDC2			PMPCA
4	Q14353	GAMT_HUMAN	GAMT			COPS6
5	O43924	PDE6D_HUMAN	PDE6D			DPT
6	P62993	GRB2_HUMAN	GRB2			TSTA3
7	Q13148	TADBP_HUMAN	TARDBP			LDB3
8	Q9UJZ1	STML2_HUMAN	STOML2			COL4A2
9	P07355	ANXA2_HUMAN	ANXA2			HSPB8
10	Q15019	SEPT2_HUMAN	SEPT2			LAMA2
11	P51665	PSMD7_HUMAN	PSMD7			SEPT4
12	Q9GZT4	SRR_HUMAN	SRR			EEF2
13	O95299	NDUAA_HUMAN	NDUFA10			RPIA
14	Q9UNS2	CSN3_HUMAN	COPS3			P4HA2
15	P04406	G3P_HUMAN	GAPDH			SERPINB8
16	P49419	AL7A1_HUMAN	ALDH7A1			PRKCDBP
17	P69905	HBA_HUMAN	HBA2			FHL3
18	Q7Z3Z0	K1C25_HUMAN	KRT25			KRT80
19	P52907	CAZA1_HUMAN	CAPZA1			ACADM
20	Q9BZK7	TBL1R_HUMAN	TBL1XR1			ATP6V1B2
21	Q5T1C6	THEM4_HUMAN	THEM4			KRT73
22	Q8NF91	SYNE1_HUMAN	SYNE1			SRSF7
23	P14923	PLAK_HUMAN	JUP			PUF60
24	Q5BKX8	MURC_HUMAN	MURC			DHRS11
25	P63261	ACTG_HUMAN	ACTG1			RABGGTA
26	Q9NQ86	TRI36_HUMAN	TRIM36			ATP5O
27	Q9UHX1	PUF60_HUMAN	PUF60			GSTM1
28	Q5XKE5	K2C79_HUMAN	KRT79			TBCE
29	P12882	MYH1_HUMAN	MYH1			G3BP2
30	P13674	P4HA1_HUMAN	P4HA1			HOMER2
31	P36873	PP1G_HUMAN	PPP1CC			C1QTNF3
32	P62140	PP1B_HUMAN	PPP1CB			HIBCH
33	Q9H4A6	GOLP3_HUMAN	GOLPH3			NME7
34	Q13158	FADD_HUMAN	FADD			MURC
35	Q8IUH3	RBM45_HUMAN	RBM45			FBLIM1
36	O94903	PROSC_HUMAN	PROSC			ITGB1BP2
37	P68402	PA1B2_HUMAN	PAFAH1B2			PPME1
38	P47756	CAPZB_HUMAN	CAPZB			FUSIP1
39	O15273	TELT_HUMAN	TCAP			PDDC1
40	Q6KB66	K2C80_HUMAN	KRT80			TNNT3
41	Q9BS40	LXN_HUMAN	LXN			FADD
42	Q01546	K22O_HUMAN	KRT76			GMPR
43	Q969J3	L12R1_HUMAN	LOH12CR1			SRSF6
44	P02647	APOA1_HUMAN	APOA1			HSPD1
45	P31942	HNRH3_HUMAN	HNRNPH3			EIF1
46	Q9NPH2	INO1_HUMAN	ISYNA1			P4HA3
47	Q14141	SEPT6_HUMAN	SEPT6			GOLPH3
48	O14773	TPP1_HUMAN	TPP1			GMPPA
49	Q9UHD8	SEPT9_HUMAN	SEPT9			FAM213B
50	Q16851	UGPA_HUMAN	UGP2			MPP6
51	P07737	PROF1_HUMAN	PFN1			UBA52
52	P20908	CO5A1_HUMAN	COL5A1			CCT8
53	P25786	PSA1_HUMAN	PSMA1			BCKDHA
54	Q16775	GLO2_HUMAN	HAGH			TCAP
55	P31930	QCR1_HUMAN	UQCRC1			TXNRD1
56	P48643	TCPE_HUMAN	CCT5			PSMA7
57	P28072	PSB6_HUMAN	PSMB6			ANKRD2
58	Q8N6M0	OTU6B_HUMAN	OTUD6B			UFD1L
59	P53582	MAP11_HUMAN	METAP1			LTF
60	Q8IVS8	GLCTK_HUMAN	GLYCTK			PDP1
61	P02766	TTHY_HUMAN	TTR			SYNE1
62	P15924	DESP_HUMAN	DSP			POLR1D
63	Q9NZR1	TMOD2_HUMAN	TMOD2			COPS3
64	Q13347	EIF3I_HUMAN	EIF3I			FAH
65	P02675	FIBB_HUMAN	FGB			VPS36
66	Q9UKS6	PACN3_HUMAN	PACSIN3			MYH13
67	Q9NV35	NUD15_HUMAN	NUDT15			MYL6
68	O43236	SEPT4_HUMAN	SEPT4			WDR12
69	P49189	AL9A1_HUMAN	ALDH9A1			GNB4
70	P13639	EF2_HUMAN	EEF2			SMTNL2
71	P62136	PP1A_HUMAN	PPP1CA			GLRX5
72	Q9NRX4	PHP14_HUMAN	PHPT1			HIF1AN
73	P51884	LUM_HUMAN	LUM			FHL1
74	O75821	EIF3G_HUMAN	EIF3G			PSMC6
75	P29762	RABP1_HUMAN	CRABP1			RBFOX2
76	P13726	TF_HUMAN	F3			PPP2CA
77	Q9H832	UBE2Z_HUMAN	UBE2Z			SRR
78	P61224	RAP1B_HUMAN	RAP1B			MAP2K6
79	P36959	GMPR1_HUMAN	GMPR			ENO3
80	Q9P0J1	PDP1_HUMAN	PDP1			CA3
81	O43639	NCK2_HUMAN	NCK2			MYBPH
82	Q6FI03	Q6FI03_HUMAN	G3BP			SRSF2
83	O75600	KBL_HUMAN	GCAT			TNNI1
84	Q7L5N1	CSN6_HUMAN	COPS6			UBE2Z
85	P37837	TALDO_HUMAN	TALDO1			STUB1
86	P00491	PNPH_HUMAN	PNP			MTHFD1
87	Q14847	LASP1_HUMAN	LASP1			NUP54
88	Q15102	PA1B3_HUMAN	PAFAH1B3			FABP3
89	Q9H0E2	TOLIP_HUMAN	TOLLIP			CAP2
90	Q9HD26	GOPC_HUMAN	GOPC			FBXO4
91	Q99497	PARK7_HUMAN	PARK7			ACTG2
92	P07451	CAH3_HUMAN	CA3			PACSIN3
93	Q15063	POSTN_HUMAN	POSTN			VBP1
94	Q53GG5	PDLI3_HUMAN	PDLIM3			RABL3
95	Q9Y2Z0	SGT1_HUMAN	SUGT1			ANGEL2
96	Q99729	ROAA_HUMAN	HNRNPAB			MYH8
97	Q969G5	PRDBP_HUMAN	PRKCDBP			HSPB2
98	Q96IJ6	GMPPA_HUMAN	GMPPA			TTN
99	P83916	CBX1_HUMAN	CBX1			KLC1
100	P68032	ACTC_HUMAN	ACTC1			HAGH
101	P60174	TPIS_HUMAN	TPI1			SRA1
102	P34897	GLYM_HUMAN	SHMT2			MYH3
103	P55010	IF5_HUMAN	EIF5			HTRA2
104	Q9UNE7	CHIP_HUMAN	STUB1			PAICS
105	Q7Z794	K2C1B_HUMAN	KRT77			HIST1H2BB
106	P06899	H2B1J_HUMAN	HIST1H2BJ			SUGT1
107	P62191	PRS4_HUMAN	PSMC1			MYOZ2
108	O14908	GIPC1_HUMAN	GIPC1			GCAT
109	Q99829	CPNE1_HUMAN	CPNE1			CDV3
110	Q6ZNW5	GDPP1_HUMAN	GDPGP1			CPNE1
111	Q71U36	TBA1A_HUMAN	TUBA1A			LSM1
112	Q07507	DERM_HUMAN	DPT			WBSCR1
113	Q86Y46	K2C73_HUMAN	KRT73			PDLIM3
114	Q92526	TCPW_HUMAN	CCT6B			TNNT2
115	P12694	ODBA_HUMAN	BCKDHA			RAP2C
116	Q9Y2S0	RPAC2_HUMAN	POLR1D			SEPT9
117	P07996	TSP1_HUMAN	THBS1			PSMD7
118	P05976	MYL1_HUMAN	MYL1			EIF5A
119	P62987	RL40_HUMAN	UBA52			PFN1
120	P40123	CAP2_HUMAN	CAP2			BAG3
121	P30086	PEBP1_HUMAN	PEBP1			SH3GLB2
122	P26368	U2AF2_HUMAN	U2AF2			PDCD6IP
123	O43175	SERA_HUMAN	PHGDH			MVD
124	Q53H96	P5CR3_HUMAN	PYCRL			STAC3
125	P40925	MDHC_HUMAN	MDH1			GIPC1
126	Q9UKP3	ITBP2_HUMAN	ITGB1BP2			NUDCD2
127	Q9BQ04	RBM4B_HUMAN	RBM4B			KCTD12
128	P13693	TCTP_HUMAN	TPT1			TMOD2
129	Q04695	K1C17_HUMAN	KRT17			CCT6B
130	P23526	SAHH_HUMAN	AHCY			MYL6B
131	P06396	GELS_HUMAN	GSN			CASQ2
132	Q96GK7	FAH2A_HUMAN	FAHD2A			NUDT15
133	Q9Y2S2	CRYL1_HUMAN	CRYL1			DSG1
134	P02771	FETA_HUMAN	AFP			MKRN1
135	P48637	GSHB_HUMAN	GSS			SPRYD7
136	Q8IY67	RAVR1_HUMAN	RAVER1			ABRACL
137	P49368	TCPG_HUMAN	CCT3			G3BP
138	P30085	KCY_HUMAN	CMPK1			ANXA4
139	Q9NXR1	NDE1_HUMAN	NDE1			PDHB
140	O75347	TBCA_HUMAN	TBCA			GOPC
141	P02533	K1C14_HUMAN	KRT14			GLYCTK
142	Q96C86	DCPS_HUMAN	DCPS			KRT78
143	Q9UHC7	MKRN1_HUMAN	MKRN1			RAVER1
144	Q6NVY1	HIBCH_HUMAN	HIBCH			TRIM36
145	P48047	ATPO_HUMAN	ATP5O			NUDT3
146	P48444	COPD_HUMAN	ARCN1			CORO6
147	Q96CX2	KCD12_HUMAN	KCTD12			PEPD
148	A0A024RDF6	A0A024RDF6_HUMAN	HNRPDL			PAK2
149	P02765	FETUA_HUMAN	AHSG			METAP1
150	P10809	CH60_HUMAN	HSPD1			AS3MT
151	P48681	NEST_HUMAN	NES			SRL
152	P20774	MIME_HUMAN	OGN			HNRNPC
153	Q01130	SRSF2_HUMAN	SRSF2			PLSCR3
154	O14818	PSA7_HUMAN	PSMA7			BIN1
155	Q16777	H2A2C_HUMAN	HIST2H2AC			TNNT1
156	P05452	TETN_HUMAN	CLEC3B			PGK1
157	E7ETK5	E7ETK5_HUMAN	IMPDH2			EIF4B
158	Q8WVJ2	NUDC2_HUMAN	NUDCD2			NDE1
159	O94905	ERLN2_HUMAN	ERLIN2
160	P10599	THIO_HUMAN	TXN
161	P45378	TNNT3_HUMAN	TNNT3
162	P61201	CSN2_HUMAN	COPS2
163	P08779	K1C16_HUMAN	KRT16
164	Q9UKX3	MYH13_HUMAN	MYH13
165	P48668	K2C6C_HUMAN	KRT6C
166	Q969T9	WBP2_HUMAN	WBP2
167	Q2TAL5	SMTL2_HUMAN	SMTNL2
168	Q16658	FSCN1_HUMAN	FSCN1
169	P21266	GSTM3_HUMAN	GSTM3
170	Q6IQ42	Q6IQ42_HUMAN	FUSIP1
171	P20073	ANXA7_HUMAN	ANXA7
172	P23381	SYWC_HUMAN	WARS
173	O00299	CLIC1_HUMAN	CLIC1
174	Q9Y371	SHLB1_HUMAN	SH3GLB1
175	Q9GZV1	ANKR2_HUMAN	ANKRD2
176	Q9UQ80	PA2G4_HUMAN	PA2G4
177	Q13442	HAP28_HUMAN	PDAP1
178	P62333	PRS10_HUMAN	PSMC6
179	O95861	BPNT1_HUMAN	BPNT1
180	Q9HAV0	GBB4_HUMAN	GNB4
181	Q13630	FCL_HUMAN	TSTA3
182	P49721	PSB2_HUMAN	PSMB2
183	P50990	TCPQ_HUMAN	CCT8
184	P13535	MYH8_HUMAN	MYH8
185	P11310	ACADM_HUMAN	ACADM
186	P01009	A1AT_HUMAN	SERPINA1
187	Q15233	NONO_HUMAN	NONO
188	P11586	C1TC_HUMAN	MTHFD1
189	P30626	SORCN_HUMAN	SRI
190	Q7Z3B4	NUP54_HUMAN	NUP54
191	P47895	AL1A3_HUMAN	ALDH1A3
192	Q14195	DPYL3_HUMAN	DPYSL3
193	P78371	TCPB_HUMAN	CCT2
194	P09382	LEG1_HUMAN	LGALS1
195	P04264	K2C1_HUMAN	KRT1
196	P13805	TNNT1_HUMAN	TNNT1
197	Q13643	FHL3_HUMAN	FHL3
198	Q13185	CBX3_HUMAN	CBX3
199	P06732	KCRM_HUMAN	CKM
200	A6NIH7	U119B_HUMAN	UNC119B
201	O43684	BUB3_HUMAN	BUB3
202	P01042	KNG1_HUMAN	KNG1
203	P52565	GDIR1_HUMAN	ARHGDIA
204	P30613	KPYR_HUMAN	PKLR
205	P62995	TRA2B_HUMAN	TRA2B
206	P15311	EZRI_HUMAN	EZR
207	P53602	MVD1_HUMAN	MVD
208	P04083	ANXA1_HUMAN	ANXA1
209	O43464	HTRA2_HUMAN	HTRA2
210	P52564	MP2K6_HUMAN	MAP2K6
211	P30740	ILEU_HUMAN	SERPINB1
212	P68104	EF1A1_HUMAN	EEF1A1
213	P68366	TBA4A_HUMAN	TUBA4A
214	Q9Y6G9	DC1L1_HUMAN	DYNC1LI1
215	P12277	KCRB_HUMAN	CKB
216	Q9Y570	PPME1_HUMAN	PPME1
217	P02768	ALBU_HUMAN	ALB
218	Q05048	CSTF1_HUMAN	CSTF1
219	Q9UL15	BAG5_HUMAN	BAG5
220	Q9Y680	FKBP7_HUMAN	FKBP7
221	P19013	K2C4_HUMAN	KRT4
222	P28161	GSTM2_HUMAN	GSTM2
223	P25398	RS12_HUMAN	RPS12
224	Q9NR46	SHLB2_HUMAN	SH3GLB2
225	P26599	PTBP1_HUMAN	PTBP1
226	P24043	LAMA2_HUMAN	LAMA2
227	P35609	ACTN2_HUMAN	ACTN2
228	P04792	HSPB1_HUMAN	HSPB1
229	Q9Y5B8	NDK7_HUMAN	NME7
230	P08727	K1C19_HUMAN	KRT19
231	P36957	ODO2_HUMAN	DLST
232	Q13162	PRDX4_HUMAN	PRDX4
233	Q9NPC6	MYOZ2_HUMAN	MYOZ2
234	P60660	MYL6_HUMAN	MYL6
235	Q9UJY1	HSPB8_HUMAN	HSPB8
236	P14649	MYL6B_HUMAN	MYL6B
237	P11021	GRP78_HUMAN	HSPA5
238	P16333	NCK1_HUMAN	NCK1
239	P17661	DESM_HUMAN	DES
240	P50452	SPB8_HUMAN	SERPINB8
241	P07910	HNRPC_HUMAN	HNRNPC
242	P63267	ACTH_HUMAN	ACTG2
243	O43399	TPD54_HUMAN	TPD52L2
244	P39019	RS19_HUMAN	RPS19
245	Q9NRN5	OLFL3_HUMAN	OLFML3
246	P48507	GSH0_HUMAN	GCLM
247	P02538	K2C6A_HUMAN	KRT6A
248	Q9UKX2	MYH2_HUMAN	MYH2
249	P67775	PP2AA_HUMAN	PPP2CA
250	P26440	IVD_HUMAN	IVD
251	Q9UNH7	SNX6_HUMAN	SNX6
252	P63241	IF5A1_HUMAN	EIF5A
253	Q92688	AN32B_HUMAN	ANP32B
254	A0A024R609	A0A024R609_HUMAN	PKM2
255	Q13907	IDI1_HUMAN	IDI1
256	Q9GZL7	WDR12_HUMAN	WDR12
257	P12429	ANXA3_HUMAN	ANXA3
258	P12109	CO6A1_HUMAN	COL6A1
259	P60709	ACTB_HUMAN	ACTB
260	P09488	GSTM1_HUMAN	GSTM1
261	P57105	SYJ2B_HUMAN	SYNJ2BP
262	Q9Y696	CLIC4_HUMAN	CLIC4
263	Q9BVA1	TBB2B_HUMAN	TUBB2B
264	Q3LXA3	DHAK_HUMAN	DAK
265	P06733	ENOA_HUMAN	ENO1
266	Q96DG6	CMBL_HUMAN	CMBL
267	P49247	RPIA_HUMAN	RPIA
268	P07339	CATD_HUMAN	CTSD
269	P12081	SYHC_HUMAN	HARS
270	O75368	SH3L1_HUMAN	SH3BGRL
271	Q9P1F3	ABRAL_HUMAN	ABRACL
272	P62873	GBB1_HUMAN	GNB1
273	Q96IU4	ABHEB_HUMAN	ABHD14B
274	P40121	CAPG_HUMAN	CAPG
275	O95678	K2C75_HUMAN	KRT75
276	Q9Y5X3	SNX5_HUMAN	SNX5
277	Q5HYI8	RABL3_HUMAN	RABL3
278	Q7Z3Y7	K1C28_HUMAN	KRT28
279	Q03252	LMNB2_HUMAN	LMNB2
280	P07858	CATB_HUMAN	CTSB
281	Q9HC38	GLOD4_HUMAN	GLOD4
282	Q9NWT6	HIF1N_HUMAN	HIF1AN
283	Q15813	TBCE_HUMAN	TBCE
284	Q92890	UFD1_HUMAN	UFD1L
285	O75083	WDR1_HUMAN	WDR1
286	P09936	UCHL1_HUMAN	UCHL1
287	Q8NFH4	NUP37_HUMAN	NUP37
288	P47710	CASA1_HUMAN	CSN1S1
289	Q92696	PGTA_HUMAN	RABGGTA
290	P07195	LDHB_HUMAN	LDHB
291	P35080	PROF2_HUMAN	PFN2
292	Q567R9	Q567R9_HUMAN	CIP29
293	Q0VDF9	HSP7E_HUMAN	HSPA14
294	Q01469	FABP5_HUMAN	FABP5
295	Q99536	VAT1_HUMAN	VAT1
296	P02545	LMNA_HUMAN	LMNA
297	Q86WR0	CCD25_HUMAN	CCDC25
298	Q9BR76	COR1B_HUMAN	CORO1B
299	A0A024R2P0	A0A024R2P0_HUMAN	RPSA
300	P49903	SPS1_HUMAN	SEPHS1
301	O75874	IDHC_HUMAN	IDH1
302	Q86TD4	SRCA_HUMAN	SRL
303	P05091	ALDH2_HUMAN	ALDH2
304	Q15417	CNN3_HUMAN	CNN3
305	Q9NZW5	MPP6_HUMAN	MPP6
306	P30101	PDIA3_HUMAN	PDIA3
307	P02760	AMBP_HUMAN	AMBP
308	Q16222	UAP1_HUMAN	UAP1
309	O00499	BIN1_HUMAN	BIN1
310	Q9BT09	CNPY3_HUMAN	CNPY3
311	P14550	AK1A1_HUMAN	AKR1A1
312	P48735	IDHP_HUMAN	IDH2
313	Q14103	HNRPD_HUMAN	HNRNPD
314	Q96A32	MLRS_HUMAN	MYLPF
315	Q9HD15	SRA1_HUMAN	SRA1
316	O14958	CASQ2_HUMAN	CASQ2
317	O14558	HSPB6_HUMAN	HSPB6
318	Q9BWD1	THIC_HUMAN	ACAT2
319	P40227	TCPZ_HUMAN	CCT6A
320	P12955	PEPD_HUMAN	PEPD
321	P36871	PGM1_HUMAN	PGM1
322	P01111	RASN_HUMAN	NRAS
323	P02790	HEMO_HUMAN	HPX
324	P28070	PSB4_HUMAN	PSMB4
325	Q13203	MYBPH_HUMAN	MYBPH
326	Q7Z4N8	P4HA3_HUMAN	P4HA3
327	Q8N1N4	K2C78_HUMAN	KRT78
328	P49918	CDN1C_HUMAN	CDKN1C
329	P32119	PRDX2_HUMAN	PRDX2
330	P61158	ARP3_HUMAN	ACTR3
331	P50395	GDIB_HUMAN	GDI2
332	Q04760	LGUL_HUMAN	GLO1
333	P30084	ECHM_HUMAN	ECHS1
334	O75112	LDB3_HUMAN	LDB3
335	P18669	PGAM1_HUMAN	PGAM1
336	Q86VN1	VPS36_HUMAN	VPS36
337	P06132	DCUP_HUMAN	UROD
338	P61978	HNRPK_HUMAN	HNRNPK
339	Q5VTE6	ANGE2_HUMAN	ANGEL2
340	P31948	STIP1_HUMAN	STIP1
341	Q02413	DSG1_HUMAN	DSG1
342	Q16629	SRSF7_HUMAN	SRSF7
343	Q9BXJ4	C1QT3_HUMAN	C1QTNF3
344	O15116	LSM1_HUMAN	LSM1
345	P00441	SODC_HUMAN	SOD1
346	P08758	ANXA5_HUMAN	ANXA5
347	Q14315	FLNC_HUMAN	FLNC
348	Q9NSB8	HOME2_HUMAN	HOMER2
349	P11177	ODPB_HUMAN	PDHB
350	O94760	DDAH1_HUMAN	DDAH1
351	O14562	UBFD1_HUMAN	UBFD1
352	Q15365	PCBP1_HUMAN	PCBP1
353	Q13011	ECH1_HUMAN	ECH1
354	P60900	PSA6_HUMAN	PSMA6
355	P51570	GALK1_HUMAN	GALK1
356	Q13838	DX39B_HUMAN	DDX39B
357	Q07955	SRSF1_HUMAN	SRSF1
358	Q9Y5Y2	NUBP2_HUMAN	NUBP2
359	P25705	ATPA_HUMAN	ATP5A1
360	Q9UKT5	FBX4_HUMAN	FBXO4
361	P17987	TCPA_HUMAN	TCP1
362	Q96DE0	NUD16_HUMAN	NUDT16
363	P13645	K1C10_HUMAN	KRT10
364	O75608	LYPA1_HUMAN	LYPLA1
365	P52209	6PGD_HUMAN	PGD
366	Q15366	PCBP2_HUMAN	PCBP2
367	P62258	1433E_HUMAN	YWHAE
368	P08729	K2C7_HUMAN	KRT7
369	P02749	APOH_HUMAN	APOH
370	Q16881	TRXR1_HUMAN	TXNRD1
371	P02788	TRFL_HUMAN	LTF
372	Q9Y3I0	RTCB_HUMAN	RTCB
373	P45880	VDAC2_HUMAN	VDAC2
374	Q9UN86	G3BP2_HUMAN	G3BP2
375	Q02750	MP2K1_HUMAN	MAP2K1
376	Q86SX6	GLRX5_HUMAN	GLRX5
377	O60884	DNJA2_HUMAN	DNAJA2
378	P30041	PRDX6_HUMAN	PRDX6
379	Q8NB37	PDDC1_HUMAN	PDDC1
380	P00367	DHE3_HUMAN	GLUD1
381	P02753	RET4_HUMAN	RBP4
382	Q8WUP2	FBLI1_HUMAN	FBLIM1
383	P12035	K2C3_HUMAN	KRT3
384	P00338	LDHA_HUMAN	LDHA
385	P45379	TNNT2_HUMAN	TNNT2
386	O95865	DDAH2_HUMAN	DDAH2
387	Q08752	PPID_HUMAN	PPID
388	P50213	IDH3A_HUMAN	IDH3A
389	Q8WUM4	PDC6I_HUMAN	PDCD6IP
390	Q9NRN7	ADPPT_HUMAN	AASDHPPT
391	P33778	H2B1B_HUMAN	HIST1H2BB
392	Q99714	HCD2_HUMAN	HSD17B10
393	O15460	P4HA2_HUMAN	P4HA2
394	P19237	TNNI1_HUMAN	TNNI1
395	Q9NQG5	RPR1B_HUMAN	RPRD1B
396	Q96EM0	T3HPD_HUMAN	L3HYPDH
397	P68371	TBB4B_HUMAN	TUBB4B
398	P12829	MYL4_HUMAN	MYL4
399	Q8TBF2	PGFS_HUMAN	FAM213B
400	P31939	PUR9_HUMAN	ATIC
401	P04075	ALDOA_HUMAN	ALDOA
402	Q16555	DPYL2_HUMAN	DPYSL2
403	P13716	HEM2_HUMAN	ALAD
404	Q96M27	PRRC1_HUMAN	PRRC1
405	P05413	FABPH_HUMAN	FABP3
406	P05388	RLA0_HUMAN	RPLP0
407	Q9BTE6	AASD1_HUMAN	AARSD1
408	Q13363	CTBP1_HUMAN	CTBP1
409	Q9UN37	VPS4A_HUMAN	VPS4A
410	Q9ULV4	COR1C_HUMAN	CORO1C
411	P61088	UBE2N_HUMAN	UBE2N
412	P02671	FIBA_HUMAN	FGA
413	Q6UWP2	DHR11_HUMAN	DHRS11
414	P55072	TERA_HUMAN	VCP
415	Q00169	PIPNA_HUMAN	PITPNA
416	P48739	PIPNB_HUMAN	PITPNB
417	Q9HBK9	AS3MT_HUMAN	AS3MT
418	Q99832	TCPH_HUMAN	CCT7
419	P00918	CAH2_HUMAN	CA2
420	Q13642	FHL1_HUMAN	FHL1
421	P13929	ENOB_HUMAN	ENO3
422	P31415	CASQ1_HUMAN	CASQ1
423	P07951	TPM2_HUMAN	TPM2
424	P62736	ACTA_HUMAN	ACTA2
425	P08572	CO4A2_HUMAN	COL4A2
426	Q3LIE5	ADPRM_HUMAN	ADPRM
427	O60814	H2B1K_HUMAN	HIST1H2BK
428	Q10713	MPPA_HUMAN	PMPCA
429	Q96MF2	STAC3_HUMAN	STAC3
430	O00764	PDXK_HUMAN	PDXK
431	P19012	K1C15_HUMAN	KRT15
432	Q9BT78	CSN4_HUMAN	COPS4
433	P46109	CRKL_HUMAN	CRKL
434	P46108	CRK_HUMAN	CRK
435	Q8N8N7	PTGR2_HUMAN	PTGR2
436	P15121	ALDR_HUMAN	AKR1B1
437	O00233	PSMD9_HUMAN	PSMD9
438	Q13177	PAK2_HUMAN	PAK2
439	O95433	AHSA1_HUMAN	AHSA1
440	P11413	G6PD_HUMAN	G6PD
441	P62879	GBB2_HUMAN	GNB2
442	Q9NRY6	PLS3_HUMAN	PLSCR3
443	P08559	ODPA_HUMAN	PDHA1
444	P11055	MYH3_HUMAN	MYH3
445	Q06323	PSME1_HUMAN	PSME1
446	Q07866	KLC1_HUMAN	KLC1
447	P09104	ENOG_HUMAN	ENO2
448	Q9Y3L5	RAP2C_HUMAN	RAP2C
449	Q75MU1	Q75MU1_HUMAN	WBSCR1
450	P00558	PGK1_HUMAN	PGK1
451	P00568	KAD1_HUMAN	AK1
452	P21281	VATB2_HUMAN	ATP6V1B2
453	P09525	ANXA4_HUMAN	ANXA4
454	Q9Y3B8	ORN_HUMAN	REXO2
455	Q9UL46	PSME2_HUMAN	PSME2
456	Q5HYK3	COQ5_HUMAN	COQ5
457	Q15493	RGN_HUMAN	RGN
458	P61326	MGN_HUMAN	MAGOH
459	Q5W111	SPRY7_HUMAN	SPRYD7
460	Q9P2R7	SUCB1_HUMAN	SUCLA2
461	P09622	DLDH_HUMAN	DLD
462	P45973	CBX5_HUMAN	CBX5
463	P16930	FAAA_HUMAN	FAH
464	Q13247	SRSF6_HUMAN	SRSF6
465	P22234	PUR6_HUMAN	PAICS
466	Q8WZ42	TITIN_HUMAN	TTN
467	P13647	K2C5_HUMAN	KRT5
468	P61758	PFD3_HUMAN	VBP1
469	O43251	RFOX2_HUMAN	RBFOX2
470	O95989	NUDT3_HUMAN	NUDT3
471	P09429	HMGB1_HUMAN	HMGB1
472	P68133	ACTS_HUMAN	ACTA1
473	P09417	DHPR_HUMAN	QDPR
474	Q16082	HSPB2_HUMAN	HSPB2
475	Q9Y230	RUVB2_HUMAN	RUVBL2
476	P50995	ANX11_HUMAN	ANXA11
477	P35908	K22E_HUMAN	KRT2
478	O95817	BAG3_HUMAN	BAG3
479	Q6P1N9	TATD1_HUMAN	TATDN1
480	P11142	HSP7C_HUMAN	HSPA8
481	P41567	EIF1_HUMAN	EIF1
482	P31943	HNRH1_HUMAN	HNRNPH1
483	P47755	CAZA2_HUMAN	CAPZA2
484	P49720	PSB3_HUMAN	PSMB3
485	P23588	IF4B_HUMAN	EIF4B
486	Q9UKY7	CDV3_HUMAN	CDV3
487	P31153	METK2_HUMAN	MAT2A
488	Q99627	CSN8_HUMAN	COPS8
489	Q2M2I5	K1C24_HUMAN	KRT24
490	O95861	BPNT1_HUMAN	BPNT1

## Sheet: ReferenceGel_AT_Samespot
Reference gel used to compare the 30 samples/gels of Perirenal (PR) and Omental (OM) adipose tissues											List of the 30 gels			Example of screenshot for the selection or not of spots to be included in the analysis based on the aligment analysis											Example of a spot abundance comparison between the 30 gels

## Sheet: ReferenceGel_Muscle_Samespot
Reference gel used to compare the 30 samples/gels of Perirenal (PR) and Omental (OM) adipose tissues											List of the 30 gels			Example of screenshot for the selection or not of spots to be included in the analysis based on the aligment analysis											Example of a spot abundance comparison between the 30 gels
